# Supplementary material
Source: Royal Society of Chemistry journal article supplement (doi:10.1039/d6qi00578k)
Supplement: d6qi00578k1.pdf [file d6qi00578k1.pdf]

Supplementary Information for

Polyoxometalate-assisted crystallization for ultraselective Ln(III)/An(VI)  
separation under strongly acidic conditions

Guangtao Zhang<sup>a</sup>, Yarui Li<sup>a</sup>, Jiarui Chen<sup>a</sup>, Yunyi Cui<sup>a</sup>, Xiaoyuan Zhou<sup>b</sup>, Qing Zou<sup>b</sup>, Xiaofeng Guo<sup>c</sup>, Yongxin Li<sup>d</sup>, Peng Lin<sup>b,\*</sup>, and Jian Lin<sup>a,\*</sup>

<sup>a</sup> School of Nuclear Science and Technology, Xi'an Jiaotong University, Xi'an 710049, PR China.  
\*jianlin@xjtu.edu.cn

<sup>b</sup> Department of Radioactive Waste Technology and Radiochemistry Research, China Nuclear Power Technology Research Institute Co., Ltd., Shenzhen 518124, P.R. China.  
\*lin\_peng@cgnpc.com.cn

<sup>c</sup> Department of Chemistry and Alexandra Navrotsky Institute for Experimental Thermodynamics, Washington State University, Pullman, WA 99164-4630, USA.

<sup>d</sup> Division of Chemistry and Biological Chemistry, School of Physical and Mathematical Sciences, Nanyang Technological University, 637371, Singapore

## Table of Contents

|                                                                                                                                                                                                                                                                                                                                                                                                                         |    |
|-------------------------------------------------------------------------------------------------------------------------------------------------------------------------------------------------------------------------------------------------------------------------------------------------------------------------------------------------------------------------------------------------------------------------|----|
| <b>Supplementary Figures</b> .....                                                                                                                                                                                                                                                                                                                                                                                      | 4  |
| <b>Fig. S1</b> PXRD patterns of simulated and as-synthesized Na-P <sub>5</sub> W <sub>30</sub> .....                                                                                                                                                                                                                                                                                                                    | 4  |
| <b>Fig. S2</b> Structure of [NaP <sub>5</sub> W <sub>30</sub> O <sub>110</sub> ] <sup>14-</sup> viewed (a) along and (b) perpendicular to the C <sub>5</sub> rotational axis. Color code: O in red, Na in yellow, P in light rose, and W in pale cyan.....                                                                                                                                                              | 4  |
| <b>Fig. S3</b> Coordination geometry of lanthanide cations in Ln-P <sub>5</sub> W <sub>30</sub> -1. Color code: Ln in chartreuse, N in pale blue, W in pale cyan, O from NO <sub>3</sub> <sup>-</sup> or WO <sub>6</sub> in red, and O from H <sub>2</sub> O in blue.....                                                                                                                                               | 5  |
| <b>Fig. S4</b> Coordination geometry of lanthanide cations in Ln-P <sub>5</sub> W <sub>30</sub> -2. Color code: O in red, Ln in orange. .5                                                                                                                                                                                                                                                                              | 5  |
| <b>Fig. S5</b> Solid-state UV-vis absorption spectra obtained from single crystals of Ln-P <sub>5</sub> W <sub>30</sub> -1 and Ln-P <sub>5</sub> W <sub>30</sub> -2.....                                                                                                                                                                                                                                                | 6  |
| <b>Fig. S6</b> SEM images and EDS spectra of (a) La-P <sub>5</sub> W <sub>30</sub> -1, (b) Ce-P <sub>5</sub> W <sub>30</sub> -1, (c) Sm-P <sub>5</sub> W <sub>30</sub> -1, (d) Eu-P <sub>5</sub> W <sub>30</sub> -2, and (e) Gd-P <sub>5</sub> W <sub>30</sub> -2, prepared by reactions of Ln(NO <sub>3</sub> ) <sub>3</sub> ·6H <sub>2</sub> O with Na-P <sub>5</sub> W <sub>30</sub> in 0.3 M HNO <sub>3</sub> ..... | 7  |
| <b>Fig. S7</b> FT-IR spectra Ln-P <sub>5</sub> W <sub>30</sub> -1 and Ln-P <sub>5</sub> W <sub>30</sub> -2 prepared by reactions of Ln(NO <sub>3</sub> ) <sub>3</sub> ·6H <sub>2</sub> O with Na-P <sub>5</sub> W <sub>30</sub> in 0.3 M HNO <sub>3</sub> in comparison with that of Na-P <sub>5</sub> W <sub>30</sub> .....                                                                                            | 8  |
| <b>Fig. S8</b> Raman spectra of Ln-P <sub>5</sub> W <sub>30</sub> -1 and Ln-P <sub>5</sub> W <sub>30</sub> -2 prepared by reactions of Ln(NO <sub>3</sub> ) <sub>3</sub> ·6H <sub>2</sub> O with Na-P <sub>5</sub> W <sub>30</sub> in 0.3 M HNO <sub>3</sub> in comparison with that of Na-P <sub>5</sub> W <sub>30</sub> .....                                                                                         | 8  |
| <b>Fig. S9</b> FT-IR spectra of Na-P <sub>5</sub> W <sub>30</sub> and the reaction product of Na-P <sub>5</sub> W <sub>30</sub> with UO <sub>2</sub> (NO <sub>3</sub> ) <sub>2</sub> ·6H <sub>2</sub> O in 0.3 M HNO <sub>3</sub> .....                                                                                                                                                                                 | 9  |
| <b>Fig. S10</b> Raman spectra of Na-P <sub>5</sub> W <sub>30</sub> and the reaction product of Na-P <sub>5</sub> W <sub>30</sub> with UO <sub>2</sub> (NO <sub>3</sub> ) <sub>2</sub> ·6H <sub>2</sub> O in 0.3 M HNO <sub>3</sub> .....                                                                                                                                                                                | 9  |
| <b>Fig. S11</b> Photographs showing the colors of the filtrate and solid product after reaction of UO <sub>2</sub> (NO <sub>3</sub> ) <sub>2</sub> ·6H <sub>2</sub> O with Na-P <sub>5</sub> W <sub>30</sub> in 0.3 M HNO <sub>3</sub> .....                                                                                                                                                                            | 10 |
| <b>Fig. S12</b> FT-IR spectra of solid-phase products obtained by selective crystallization from binary Ln(III)/U(VI) systems (Ln = La, Ce, Sm, Eu, and Gd) in 0.3 M HNO <sub>3</sub> .....                                                                                                                                                                                                                             | 10 |
| <b>Fig. S13</b> Raman spectra of solid-phase products obtained by selective crystallization from binary Ln(III)/U(VI) systems (Ln = La, Ce, Sm, Eu, and Gd) in 0.3 M HNO <sub>3</sub> .....                                                                                                                                                                                                                             | 11 |
| <b>Fig. S14</b> SEM images and EDS spectra of (a) La-P <sub>5</sub> W <sub>30</sub> -1, (b) Ce-P <sub>5</sub> W <sub>30</sub> -1, (c) Sm-P <sub>5</sub> W <sub>30</sub> -1, (d) Eu-P <sub>5</sub> W <sub>30</sub> -1, and (e) Gd-P <sub>5</sub> W <sub>30</sub> -1, prepared by reactions of Ln(NO <sub>3</sub> ) <sub>3</sub> ·6H <sub>2</sub> O with Na-P <sub>5</sub> W <sub>30</sub> in 3 M HNO <sub>3</sub> .....  | 12 |
| <b>Fig. S15</b> FT-IR spectra of Ln-P <sub>5</sub> W <sub>30</sub> -1 and Ln-P <sub>5</sub> W <sub>30</sub> -2 prepared by reactions of Ln(NO <sub>3</sub> ) <sub>3</sub> ·6H <sub>2</sub> O with Na-P <sub>5</sub> W <sub>30</sub> in 3 M HNO <sub>3</sub> in comparison with that of Na-P <sub>5</sub> W <sub>30</sub> .....                                                                                          | 13 |
| <b>Fig. S16</b> Raman spectra of Ln-P <sub>5</sub> W <sub>30</sub> -1 and Ln-P <sub>5</sub> W <sub>30</sub> -2 prepared by reactions of Ln(NO <sub>3</sub> ) <sub>3</sub> ·6H <sub>2</sub> O with Na-P <sub>5</sub> W <sub>30</sub> in 3 M HNO <sub>3</sub> in comparison with that of Na-P <sub>5</sub> W <sub>30</sub> .....                                                                                          | 13 |
| <b>Fig. S17</b> FT-IR spectra of Na-P <sub>5</sub> W <sub>30</sub> and the reaction product of Na-P <sub>5</sub> W <sub>30</sub> with UO <sub>2</sub> (NO <sub>3</sub> ) <sub>2</sub> ·6H <sub>2</sub> O in 3 M HNO <sub>3</sub> .....                                                                                                                                                                                  | 14 |
| <b>Fig. S18</b> Raman spectra of Na-P <sub>5</sub> W <sub>30</sub> and the reaction product of Na-P <sub>5</sub> W <sub>30</sub> with UO <sub>2</sub> (NO <sub>3</sub> ) <sub>2</sub> ·6H <sub>2</sub> O in 3 M HNO <sub>3</sub> .....                                                                                                                                                                                  | 14 |

|                                                                                                                                                                                                                                                                             |    |
|-----------------------------------------------------------------------------------------------------------------------------------------------------------------------------------------------------------------------------------------------------------------------------|----|
| <b>Fig. S19</b> PXRD patterns of the solid-phase products obtained by selective crystallization from binary Ln(III)/U(VI) systems (Ln = La, Ce, Sm, Eu, and Gd) in 3 M HNO <sub>3</sub> , compared with the simulated pattern of La-P <sub>5</sub> W <sub>30</sub> -1. .... | 15 |
| <b>Fig. S20</b> FTIR spectra of the solid-phase products obtained by selective crystallization from binary Ln(III)/U(VI) systems (Ln = La, Ce, Sm, Eu, and Gd) in 3 M HNO <sub>3</sub> .....                                                                                | 15 |
| <b>Fig. S21</b> Raman spectra of the solid-phase products obtained by selective crystallization from binary Ln(III)/U(VI) systems (Ln = La, Ce, Sm, Eu, and Gd) in 3 M HNO <sub>3</sub> .....                                                                               | 16 |
| <b>Supplementary Tables</b> .....                                                                                                                                                                                                                                           | 17 |
| <b>Table S1</b> Crystallographic data for Ln-P <sub>5</sub> W <sub>30</sub> -1 (La, Ce, Sm, and Eu) and Ln-P <sub>5</sub> W <sub>30</sub> -2 (Gd). ....                                                                                                                     | 17 |
| <b>Table S2</b> Comparison of An(VI)/Ln(III) separation factors (SFs) for solid-phase separation methods, including adsorption and selective crystallization reported in the literature, as well as the selective crystallization demonstrated in this work. ....           | 18 |
| <b>Supplementary References</b> .....                                                                                                                                                                                                                                       | 19 |

## Supplementary Figures

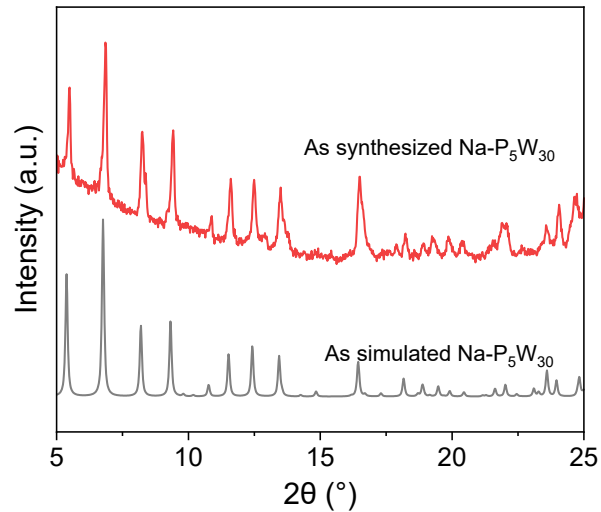

**Fig. S1.** PXRD patterns of simulated and as-synthesized Na-P<sub>5</sub>W<sub>30</sub>.

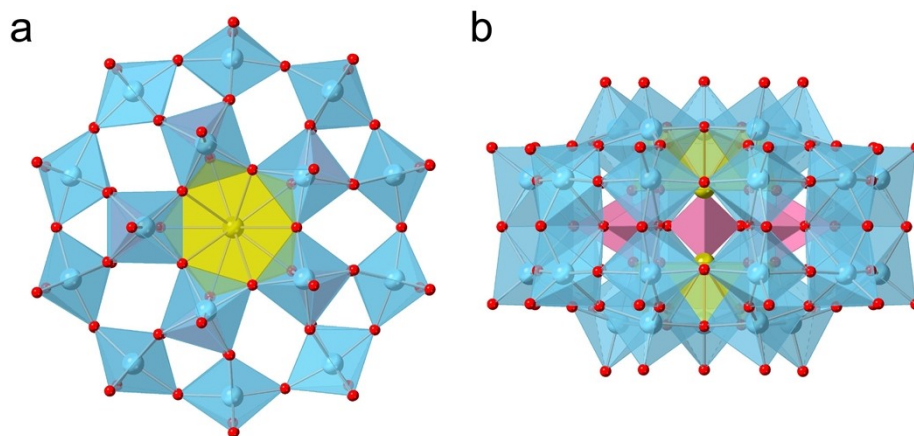

**Fig. S2.** Structure of [NaP<sub>5</sub>W<sub>30</sub>O<sub>110</sub>]<sup>14-</sup> viewed (a) along and (b) perpendicular to the C<sub>5</sub> rotational axis. Color code: O in red, Na in yellow, P in light rose, and W in pale cyan.

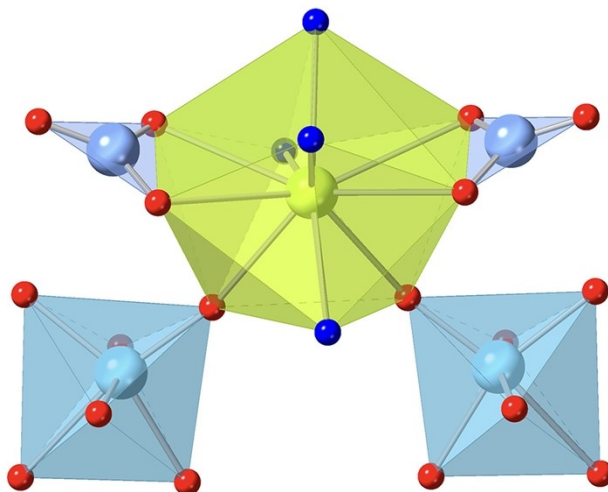

**Fig. S3.** Coordination geometry of lanthanide cations in  $\text{Ln-P}_5\text{W}_{30-1}$ . Color code: Ln in chartreuse, N in pale blue, W in pale cyan, O from  $\text{NO}_3^-$  or  $\text{WO}_6$  in red, and O from  $\text{H}_2\text{O}$  in blue.

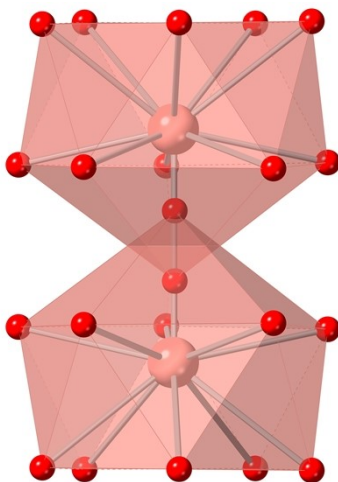

**Fig. S4.** Coordination geometry of lanthanide cations in  $\text{Ln-P}_5\text{W}_{30-2}$ . Color code: O in red, Ln in orange.

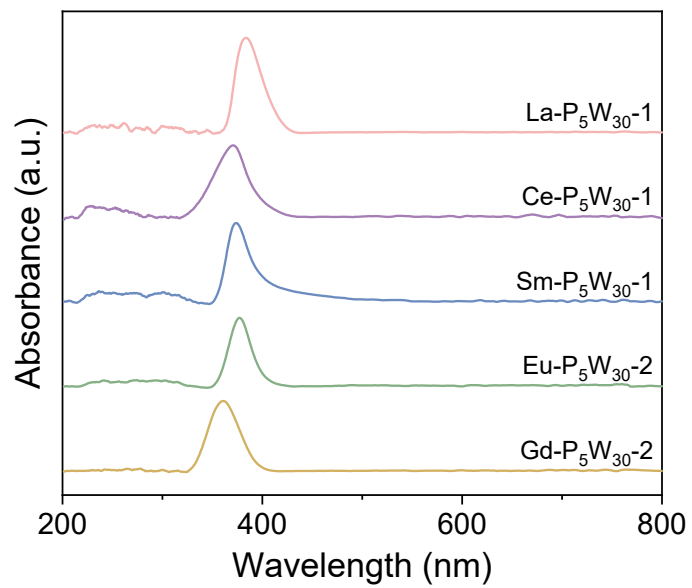

**Fig. S5.** Solid-state UV-vis absorption spectra obtained from single crystals of Ln-P<sub>5</sub>W<sub>30</sub>-1 and Ln-P<sub>5</sub>W<sub>30</sub>-2.

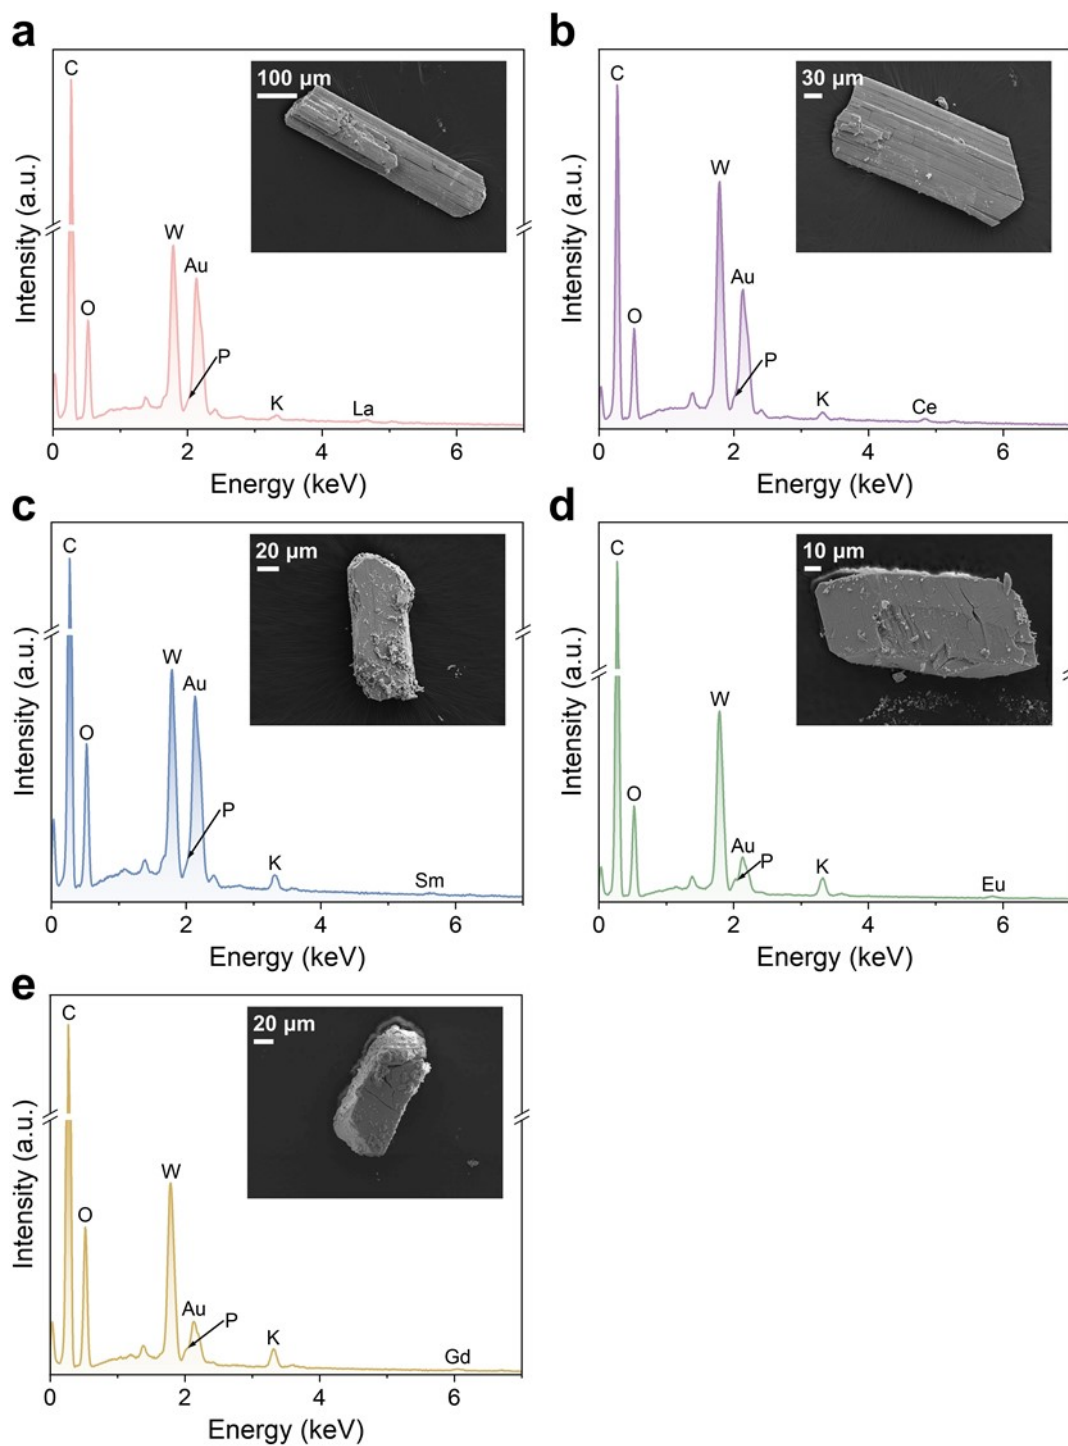

**Fig. S6.** SEM images and EDS spectra of (a) La- $P_5W_{30}$ -1, (b) Ce- $P_5W_{30}$ -1, (c) Sm- $P_5W_{30}$ -1, (d) Eu- $P_5W_{30}$ -2, and (e) Gd- $P_5W_{30}$ -2, prepared by reactions of  $\text{Ln}(\text{NO}_3)_3 \cdot 6\text{H}_2\text{O}$  with  $\text{Na-P}_5\text{W}_{30}$  in 0.3 M  $\text{HNO}_3$ .

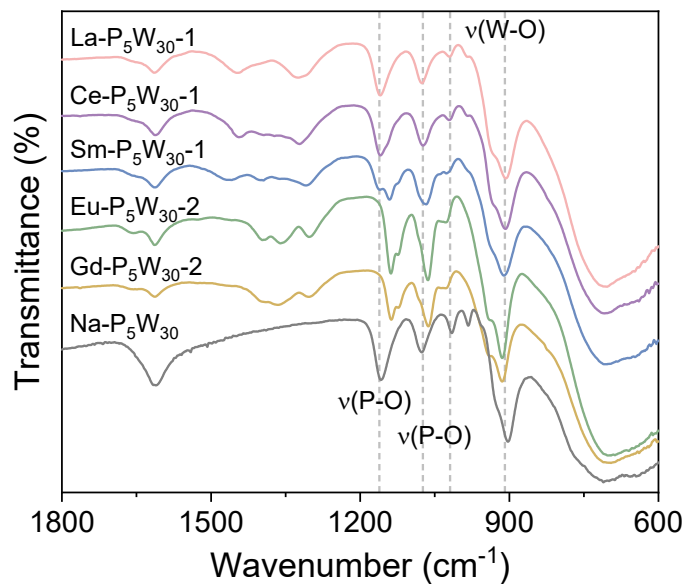

**Fig. S7.** FT-IR spectra  $\text{Ln-P}_5\text{W}_{30-1}$  and  $\text{Ln-P}_5\text{W}_{30-2}$  prepared by reactions of  $\text{Ln}(\text{NO}_3)_3 \cdot 6\text{H}_2\text{O}$  with  $\text{Na-P}_5\text{W}_{30}$  in 0.3 M  $\text{HNO}_3$  in comparison with that of  $\text{Na-P}_5\text{W}_{30}$ .

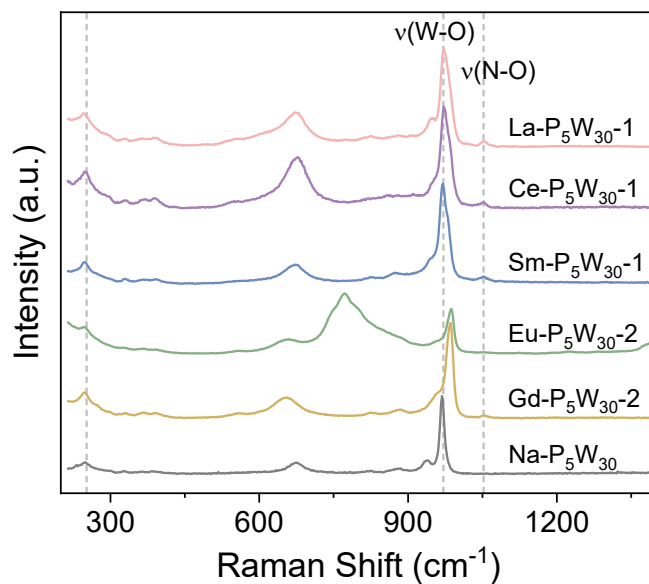

**Fig. S8.** Raman spectra of  $\text{Ln-P}_5\text{W}_{30-1}$  and  $\text{Ln-P}_5\text{W}_{30-2}$  prepared by reactions of  $\text{Ln}(\text{NO}_3)_3 \cdot 6\text{H}_2\text{O}$  with  $\text{Na-P}_5\text{W}_{30}$  in 0.3 M  $\text{HNO}_3$  in comparison with that of  $\text{Na-P}_5\text{W}_{30}$ .

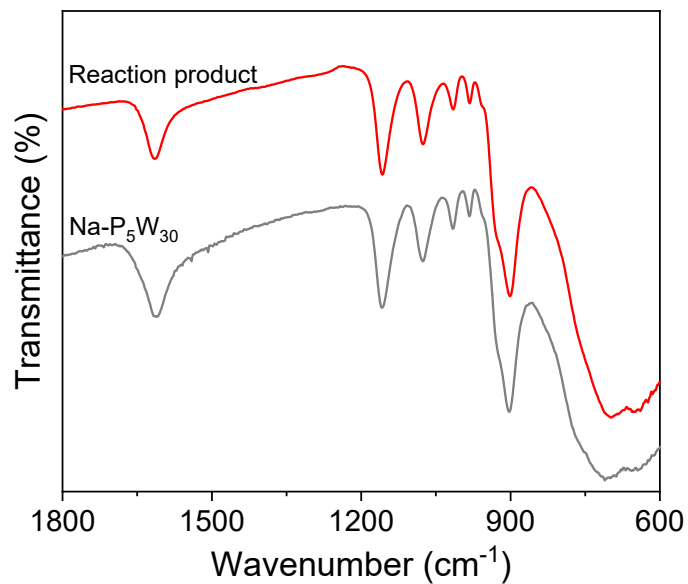

**Fig. S9.** FT-IR spectra of Na-P<sub>5</sub>W<sub>30</sub> and the reaction product of Na-P<sub>5</sub>W<sub>30</sub> with UO<sub>2</sub>(NO<sub>3</sub>)<sub>2</sub>·6H<sub>2</sub>O in 0.3 M HNO<sub>3</sub>.

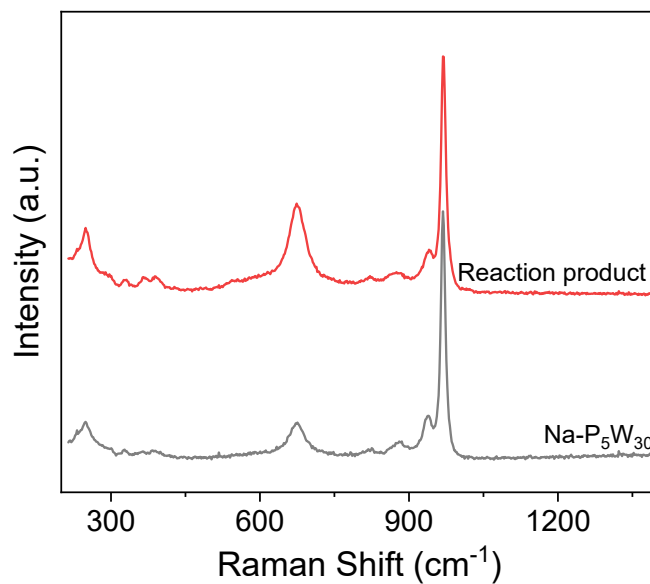

**Fig. S10.** Raman spectra of Na-P<sub>5</sub>W<sub>30</sub> and the reaction product of Na-P<sub>5</sub>W<sub>30</sub> with UO<sub>2</sub>(NO<sub>3</sub>)<sub>2</sub>·6H<sub>2</sub>O in 0.3 M HNO<sub>3</sub>.

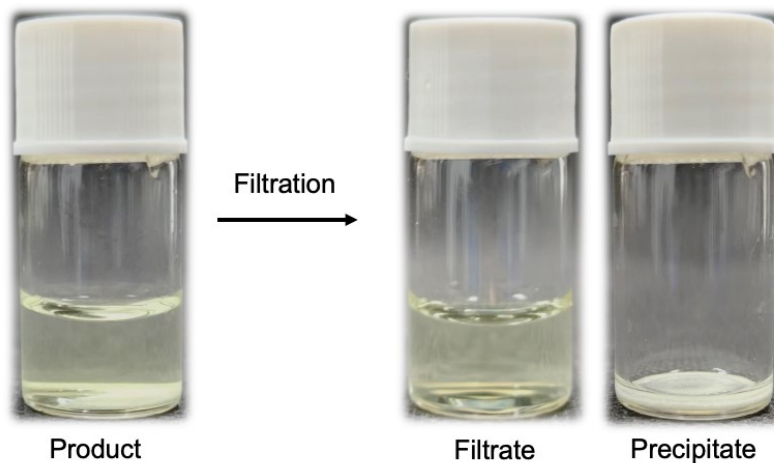

**Fig. S11.** Photographs showing the colors of the filtrate and solid product after reaction of  $\text{UO}_2(\text{NO}_3)_2 \cdot 6\text{H}_2\text{O}$  with  $\text{Na-P}_5\text{W}_{30}$  in 0.3 M  $\text{HNO}_3$ .

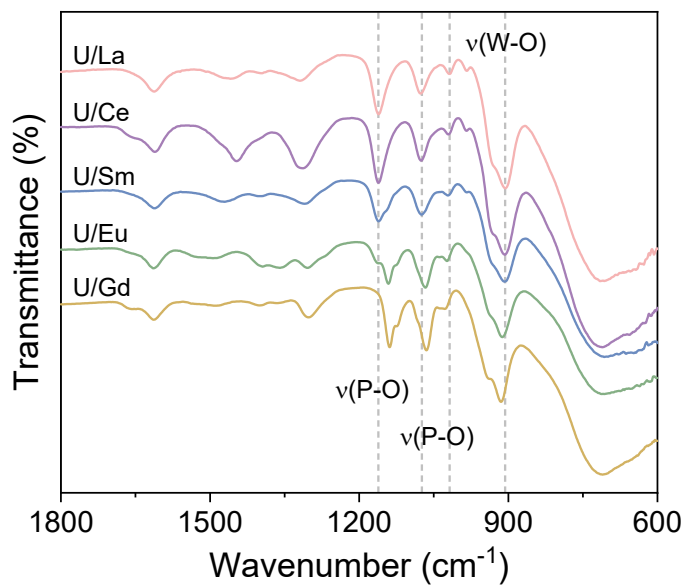

**Fig. S12.** FT-IR spectra of solid-phase products obtained by selective crystallization from binary  $\text{Ln}(\text{III})/\text{U}(\text{VI})$  systems ( $\text{Ln} = \text{La}, \text{Ce}, \text{Sm}, \text{Eu}, \text{and Gd}$ ) in 0.3 M  $\text{HNO}_3$ .

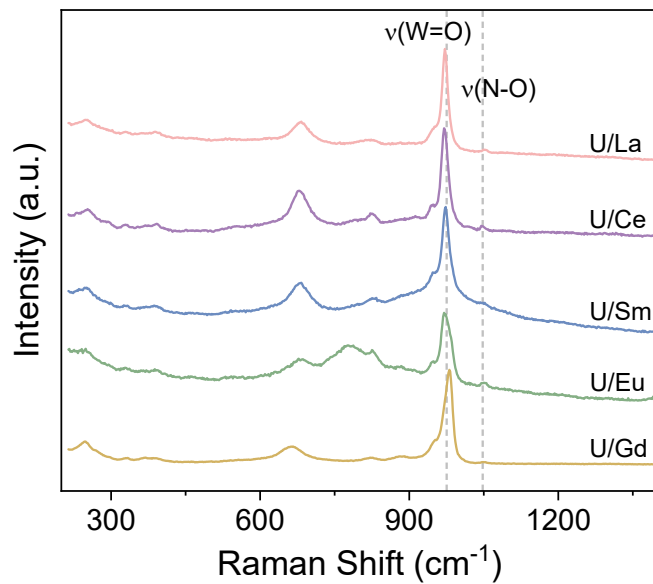

**Fig. S13.** Raman spectra of solid-phase products obtained by selective crystallization from binary Ln(III)/U(VI) systems (Ln = La, Ce, Sm, Eu, and Gd) in 0.3 M HNO<sub>3</sub>.

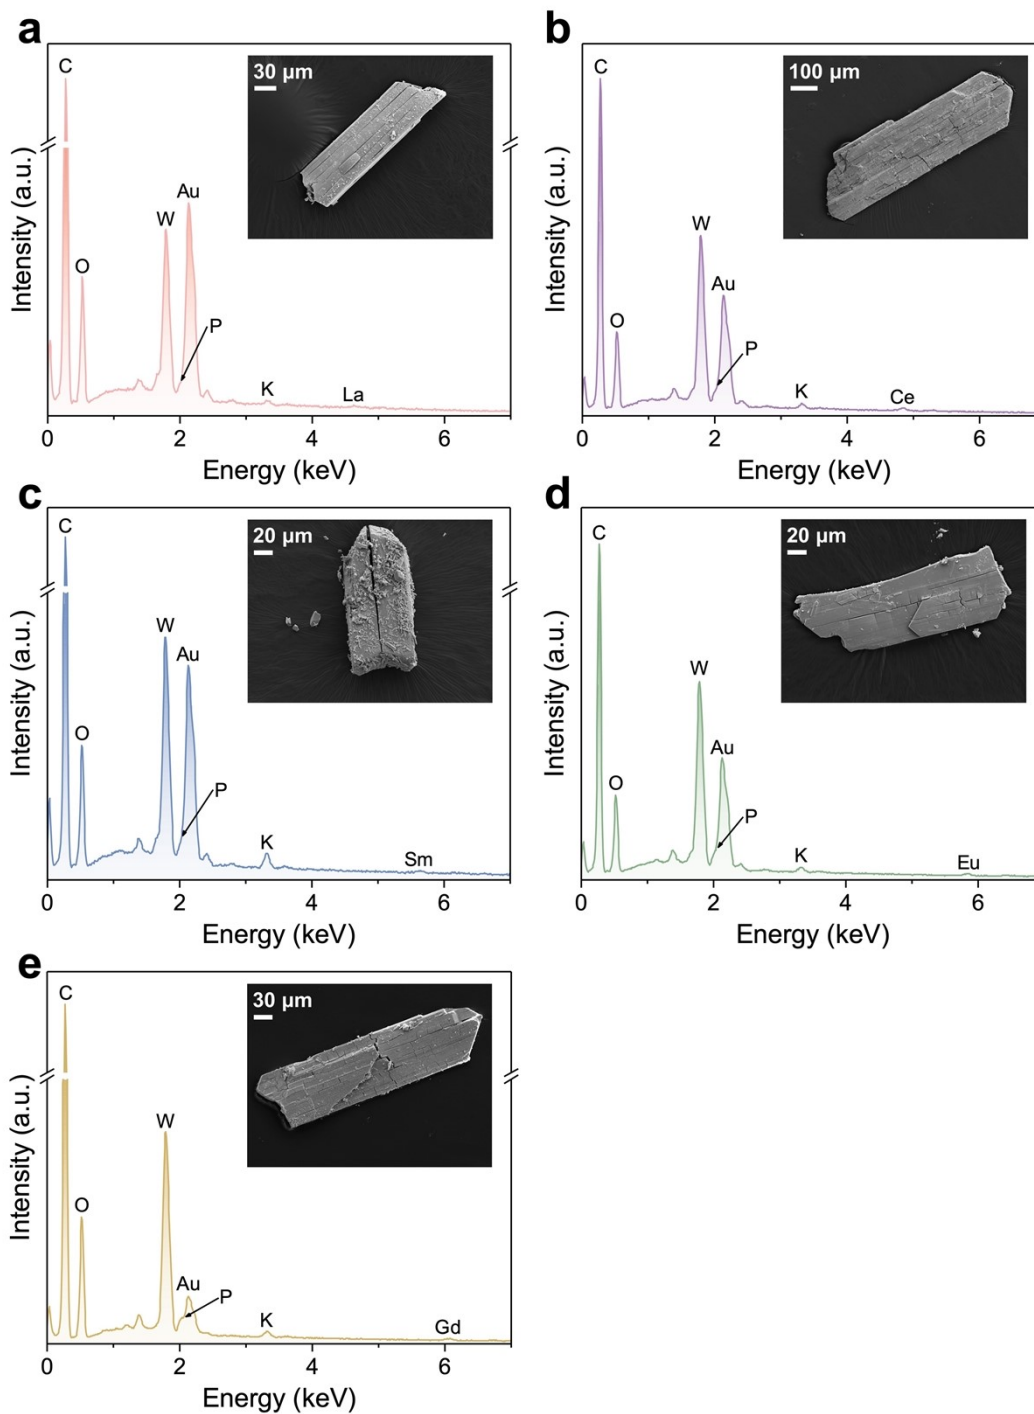

**Fig. S14.** SEM images and EDS spectra of (a) La-P<sub>5</sub>W<sub>30</sub>-1, (b) Ce-P<sub>5</sub>W<sub>30</sub>-1, (c) Sm-P<sub>5</sub>W<sub>30</sub>-1, (d) Eu-P<sub>5</sub>W<sub>30</sub>-1, and (e) Gd-P<sub>5</sub>W<sub>30</sub>-1, prepared by reactions of Ln(NO<sub>3</sub>)<sub>3</sub>·6H<sub>2</sub>O with Na-P<sub>5</sub>W<sub>30</sub> in 3 M HNO<sub>3</sub>.

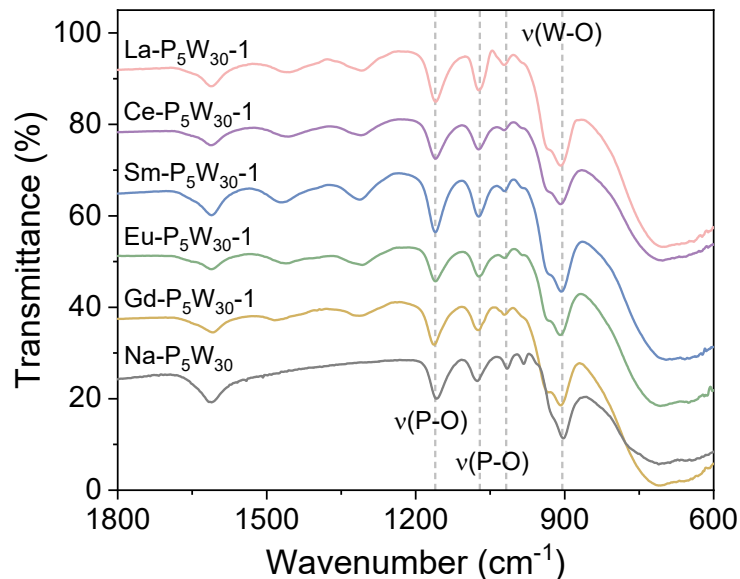

**Fig. S15.** FT-IR spectra of  $\text{Ln-P}_5\text{W}_{30-1}$  and  $\text{Ln-P}_5\text{W}_{30-2}$  prepared by reactions of  $\text{Ln}(\text{NO}_3)_3 \cdot 6\text{H}_2\text{O}$  with  $\text{Na-P}_5\text{W}_{30}$  in 3 M  $\text{HNO}_3$  in comparison with that of  $\text{Na-P}_5\text{W}_{30}$ .

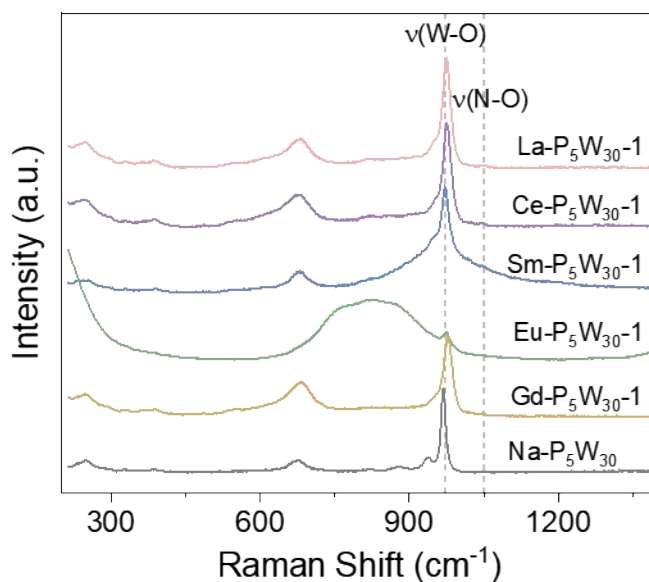

**Fig. S16.** Raman spectra of  $\text{Ln-P}_5\text{W}_{30-1}$  and  $\text{Ln-P}_5\text{W}_{30-2}$  prepared by reactions of  $\text{Ln}(\text{NO}_3)_3 \cdot 6\text{H}_2\text{O}$  with  $\text{Na-P}_5\text{W}_{30}$  in 3 M  $\text{HNO}_3$  in comparison with that of  $\text{Na-P}_5\text{W}_{30}$ .

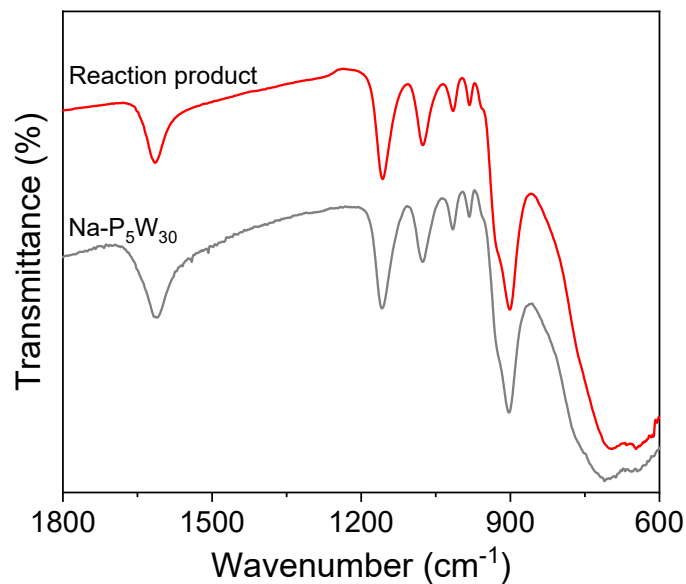

**Fig. S17.** FT-IR spectra of Na-P<sub>5</sub>W<sub>30</sub> and the reaction product of Na-P<sub>5</sub>W<sub>30</sub> with UO<sub>2</sub>(NO<sub>3</sub>)<sub>2</sub>·6H<sub>2</sub>O in 3 M HNO<sub>3</sub>.

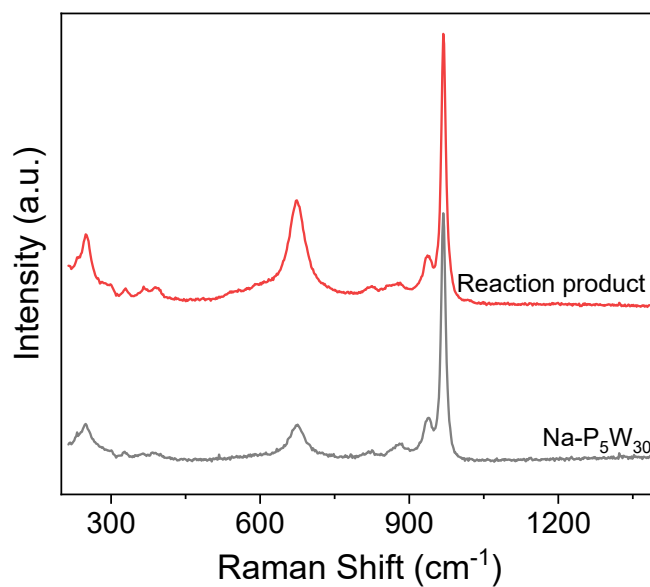

**Fig. S18.** Raman spectra of Na-P<sub>5</sub>W<sub>30</sub> and the reaction product of Na-P<sub>5</sub>W<sub>30</sub> with UO<sub>2</sub>(NO<sub>3</sub>)<sub>2</sub>·6H<sub>2</sub>O in 3 M HNO<sub>3</sub>.

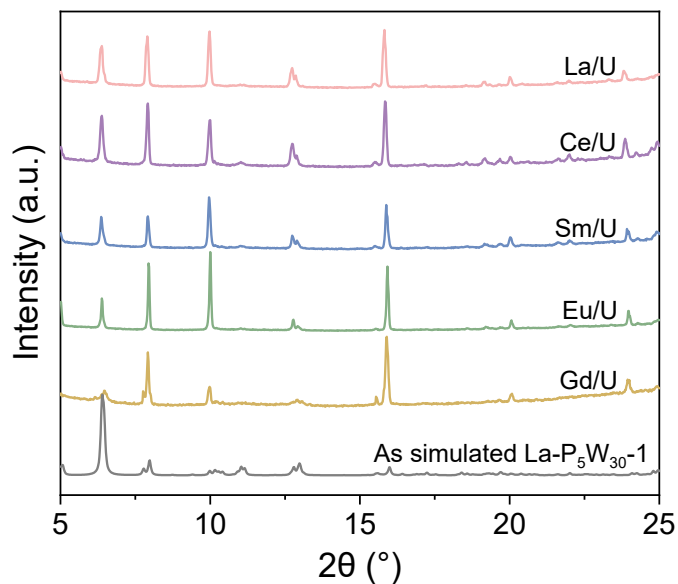

**Fig. S19.** PXRD patterns of the solid-phase products obtained by selective crystallization from binary Ln(III)/U(VI) systems (Ln = La, Ce, Sm, Eu, and Gd) in 3 M HNO<sub>3</sub>, compared with the simulated pattern of La-P<sub>5</sub>W<sub>30</sub>-1.

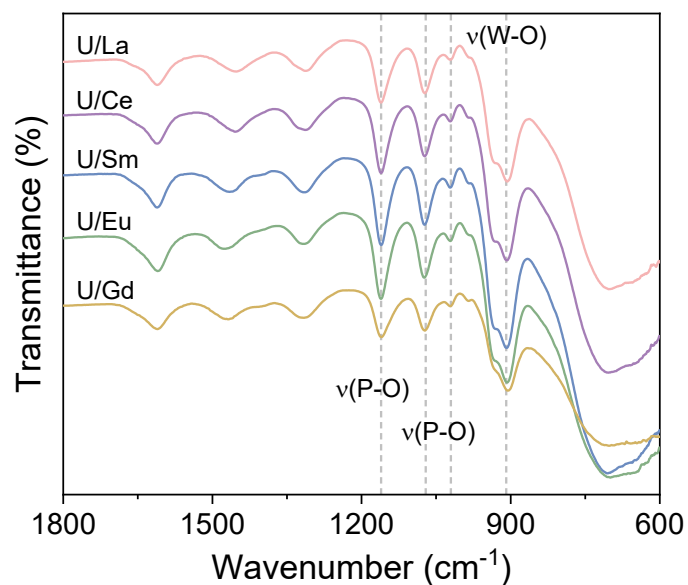

**Fig. S20.** FTIR spectra of the solid-phase products obtained by selective crystallization from binary Ln(III)/U(VI) systems (Ln = La, Ce, Sm, Eu, and Gd) in 3 M HNO<sub>3</sub>.

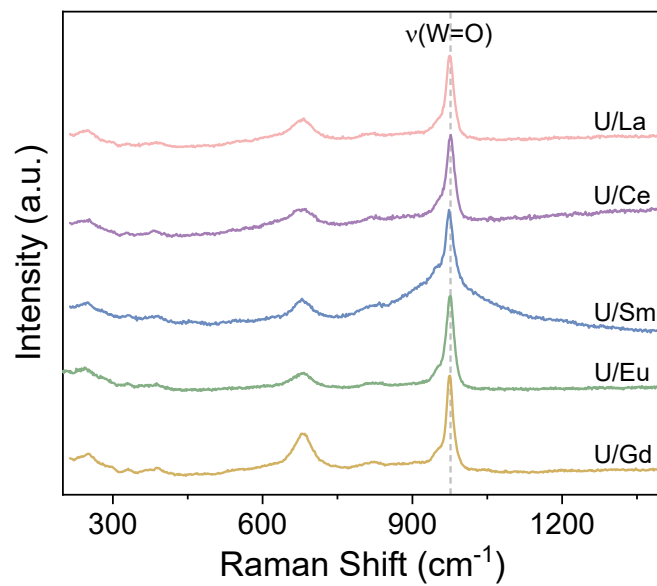

**Fig. S21.** Raman spectra of the solid-phase products obtained by selective crystallization from binary Ln(III)/U(VI) systems (Ln = La, Ce, Sm, Eu, and Gd) in 3 M  $\text{HNO}_3$ .

## Supplementary Tables

**Table S1.** Crystallographic data for Ln-P<sub>5</sub>W<sub>30</sub>-1 (La, Ce, Sm, and Eu) and Ln-P<sub>5</sub>W<sub>30</sub>-2 (Gd).

| Compound                              | La-P <sub>5</sub> W <sub>30</sub> -1                                                                               | Ce-P <sub>5</sub> W <sub>30</sub> -1                                                                               | Sm-P <sub>5</sub> W <sub>30</sub> -1                                                                                                      | Eu-P <sub>5</sub> W <sub>30</sub> -1                                                                                             | Gd-P <sub>5</sub> W <sub>30</sub> -2                                                                  |
|---------------------------------------|--------------------------------------------------------------------------------------------------------------------|--------------------------------------------------------------------------------------------------------------------|-------------------------------------------------------------------------------------------------------------------------------------------|----------------------------------------------------------------------------------------------------------------------------------|-------------------------------------------------------------------------------------------------------|
| CCDC number                           | 2422242                                                                                                            | 2522240                                                                                                            | 2522243                                                                                                                                   | 252241                                                                                                                           | 252244                                                                                                |
| Formula                               | K <sub>6</sub> H <sub>44</sub> La <sub>2</sub> NaN <sub>4</sub><br>O <sub>141</sub> P <sub>5</sub> W <sub>30</sub> | K <sub>6</sub> H <sub>46</sub> Ce <sub>2</sub> NaN <sub>4</sub><br>O <sub>142</sub> P <sub>5</sub> W <sub>30</sub> | K <sub>6</sub> H <sub>45.72</sub> Sm <sub>2.14</sub> Na <sub>0.86</sub> N <sub>4</sub><br>O <sub>142</sub> P <sub>5</sub> W <sub>30</sub> | K <sub>4</sub> H <sub>26</sub> Eu <sub>2</sub> Na <sub>3</sub> N <sub>4</sub><br>O <sub>132</sub> P <sub>5</sub> W <sub>30</sub> | K <sub>5</sub> H <sub>46</sub> GdNa <sub>2</sub> N<br>O <sub>133</sub> P <sub>5</sub> W <sub>30</sub> |
| Formula weight                        | 8564.88                                                                                                            | 8582.32                                                                                                            | 8620.41                                                                                                                                   | 8393.60                                                                                                                          | 8257.20                                                                                               |
| $\rho_{calc}$ (g cm <sup>-3</sup> )   | 4.086                                                                                                              | 4.090                                                                                                              | 4.157                                                                                                                                     | 4.038                                                                                                                            | 4.467                                                                                                 |
| $\mu$ (mm <sup>-1</sup> )             | 25.762                                                                                                             | 25.775                                                                                                             | 26.284                                                                                                                                    | 26.150                                                                                                                           | 29.033                                                                                                |
| Color                                 | colorless                                                                                                          | colorless                                                                                                          | colorless                                                                                                                                 | colorless                                                                                                                        | colorless                                                                                             |
| Space group                           | <i>P</i> 2 <sub>1</sub> / <i>m</i>                                                                                 | <i>P</i> 2 <sub>1</sub> / <i>m</i>                                                                                 | <i>P</i> 2 <sub>1</sub> / <i>m</i>                                                                                                        | <i>P</i> 2 <sub>1</sub> / <i>m</i>                                                                                               | <i>P</i> 2 <sub>1</sub> / <i>m</i>                                                                    |
| a (Å)                                 | 17.774(2)                                                                                                          | 17.792(3)                                                                                                          | 17.709(2)                                                                                                                                 | 17.688(2)                                                                                                                        | 16.4243(17)                                                                                           |
| b (Å)                                 | 22.008(2)                                                                                                          | 21.961(3)                                                                                                          | 21.906(3)                                                                                                                                 | 22.029 (2)                                                                                                                       | 21.376(2)                                                                                             |
| c (Å)                                 | 18.0692(19)                                                                                                        | 18.126(3)                                                                                                          | 18.0279(18)                                                                                                                               | 18.014(2)                                                                                                                        | 17.499(2)                                                                                             |
| $\alpha$ (deg)                        | 90                                                                                                                 | 90                                                                                                                 | 90                                                                                                                                        | 90                                                                                                                               | 90                                                                                                    |
| $\beta$ (deg)                         | 104.629(4)                                                                                                         | 101.839(5)                                                                                                         | 101.690(4)                                                                                                                                | 101.361(5)                                                                                                                       | 96.475(5)                                                                                             |
| $\gamma$ (deg)                        | 90                                                                                                                 | 90                                                                                                                 | 90                                                                                                                                        | 90                                                                                                                               | 90                                                                                                    |
| <i>V</i> (Å <sup>3</sup> )            | 6923.2(14)                                                                                                         | 6932.0(18)                                                                                                         | 6848.5(14)                                                                                                                                | 6881.5(14)                                                                                                                       | 6104.6(11)                                                                                            |
| <i>Z</i>                              | 2                                                                                                                  | 2                                                                                                                  | 2                                                                                                                                         | 2                                                                                                                                | 2                                                                                                     |
| <i>T</i> (K)                          | 150.0                                                                                                              | 150.0                                                                                                              | 150.0                                                                                                                                     | 150.0                                                                                                                            | 150.0                                                                                                 |
| $\lambda$ (Å)                         | 0.71073                                                                                                            | 0.71073                                                                                                            | 0.71073                                                                                                                                   | 0.71073                                                                                                                          | 0.71073                                                                                               |
| <i>Max 2<math>\theta</math></i> (deg) | 55.028                                                                                                             | 54.968                                                                                                             | 55.016                                                                                                                                    | 54.96                                                                                                                            | 54.97                                                                                                 |
| <i>R</i> <sub>1</sub>                 | 0.0487                                                                                                             | 0.0475                                                                                                             | 0.0435                                                                                                                                    | 0.0594                                                                                                                           | 0.0927                                                                                                |
| <i>wR</i> <sub>2</sub>                | 0.1253                                                                                                             | 0.0991                                                                                                             | 0.0923                                                                                                                                    | 0.1467                                                                                                                           | 0.2558                                                                                                |
| <i>R</i> <sub>int</sub>               | 0.1173                                                                                                             | 0.0935                                                                                                             | 0.1432                                                                                                                                    | 0.1304                                                                                                                           | 0.1610                                                                                                |
| <i>Goof</i>                           | 1.056                                                                                                              | 1.036                                                                                                              | 1.022                                                                                                                                     | 1.039                                                                                                                            | 1.042                                                                                                 |

**Table S2.** Comparison of An(VI)/Ln(III) separation factors (SFs) for solid-phase separation methods, including adsorption and selective crystallization reported in the literature, as well as the selective crystallization demonstrated in this work.

| Separation method         | Materials or crystallization ligands | SF     | Acidity                     | Ref.             |
|---------------------------|--------------------------------------|--------|-----------------------------|------------------|
| Adsorption                | 1f                                   | 99     | pH=3                        | 1                |
|                           | BNNSs-DAPhen                         | 196    | 5 M HNO <sub>3</sub>        | 2                |
|                           | BCN-DAPhen                           | 592    | 5 M HNO <sub>3</sub>        | 3                |
|                           | HfP-0.80                             | 696    | 0.1 M HNO <sub>3</sub>      | 4                |
|                           | 4e                                   | 1144   | pH=3                        | 1                |
|                           | SBA-15-ABDMA                         | 1293   | pH=3                        | 5                |
|                           | T-DOPOR                              | 1543   | pH=2                        | 6                |
|                           | DAPhen-COF                           | 5170   | 0.5 M HNO <sub>3</sub>      | 7                |
|                           | BIMB                                 | 10010  | pH=3                        | 8                |
|                           | 3c                                   | 14082  | pH=3                        | 1                |
| 4d                        | 116140                               | pH=3   | 1                           |                  |
| Selective crystallization | Se <sub>6</sub> W <sub>45</sub>      | 1100   | 0.1 M HNO <sub>3</sub>      | 9                |
|                           | P <sub>5</sub> W <sub>30</sub>       | 41139  | 3 M HNO <sub>3</sub>        | <b>This work</b> |
|                           | NMP                                  | 402    | 3 M HNO <sub>3</sub>        | 10               |
|                           | L2                                   | 6571   | 0.5 M HNO <sub>3</sub>      | 11               |
|                           | IDRET                                | 48586  | pH=3                        | 12               |
|                           | NMP                                  | 201700 | 1.5 M HNO <sub>3</sub>      | 10               |
|                           | L2                                   | 756276 | 0.08 M CH <sub>3</sub> COOH | 13               |

1f: N'1, N'4-bis((E)-pyridin-2-ylmethylene)terephthalohydrazide. BNNSs–DAPhen: Boron nitride nanosheets-diamide phenanthroline. BCN–DAPhen: Phenanthroline diamide functionalized porous carbon doped boron nitride. 4e: (E)-2-hydroxy-N'-(pyrimidin-2-ylmethylene)benzohydrazide. T-DOPOR: Modified cellulose microspheres. BIMB: 1,4-bis(imidazol-1-ylmethyl)benzene. 3c: (E)-N'-(2-hydroxybenzylidene)benzohydrazide. 4d: (E)-N'-(2-hydroxybenzylidene)picolinohydrazide. NMP: N-methyl 2-pyrrolidone. L2: (E)-N'-(pyridin-2-ylmethylene)picolinohydrazide.

## Supplementary References

- [1] J. Wang, R. Yao, Y. Li, Z. Lu, B. Yang, Z. Wu, Y. Li, J. Zeng, Z. Geng and Z. Wang, Planar-coordination-induced precipitation by hydrazone-bridged clusters enables uranium–rare earth separation and high-purity uranium recovery from nuclear wastewater, *J. Hazard. Mater.*, 2025, **499**, 140233.
- [2] G. Chen, H. Weng, Z. Wu, Y. Chen, P. Zhang, G. Ye and M. Lin, High-yield production of monolayer boron nitride nanosheets by cationic-surfactant-assisted solvothermal exfoliation for the ultrafast and selective separation of U(VI) from lanthanides, *Sep. Purif. Technol.*, 2021, **278**, 119645.
- [3] Y. Chen, P. Zhang, L. Jiao, G. Chen, Y. Yang, H. Chong and M. Lin, High efficient and selective removal of U(VI) from lanthanides by phenanthroline diamide functionalized carbon doped boron nitride, *Chem. Eng. J.*, 2022, **446**, 137337.
- [4] L.-p. Xiong, K. Lv, M. Gu, C.-t. Yang, F.-c. Wu, J. Han and S. Hu, Efficient capture of actinides from strong acidic solution by hafnium phosphonate frameworks with excellent acid resistance and radiolytic stability, *Chem. Eng. J.*, 2019, **355**, 159-169.
- [5] F. Zhang, Y. Liu, K.-Q. Ma, H. Yan, Y. Luo, F.-C. Wu, C.-T. Yang, S. Hu and S.-M. Peng, Highly selective extraction of uranium from wastewater using amine-bridged diacetamide-functionalized silica, *J. Hazard. Mater.*, 2022, **435**, 129022.
- [6] D. Wen, C. Xie, Z. Dong, M. Zhang, M. Zhai and L. Zhao, Facile preparation of novel DOPO functionalized cellulose microspheres with superior selectivity for U(VI) from lanthanides, *Sep. Purif. Technol.*, 2022, **301**, 121969.
- [7] R.-J. Cao, H.-Y. Zhou, Q.-Y. Wu, Z. Xiao, T.-Y. Xiu, J. Li, H.-B. Tang, L.-Y. Yuan, W.-S. Wu and W.-Q. Shi, Rigidity-Flexibility Regulation and Hard-Soft Donor Combination: Dual Strategies in Covalent Organic Frameworks Construction for Actinides/lanthanides Separation, *Adv. Mater.*, 2025, **37**, 2414659.
- [8] R. Yao, Y. Li, J. Wang, B. Yang, Z. Wu, Y. Li, Z. Lu, J. Zeng, Z. Geng and Z. Wang, Efficient Uranium/Lanthanides Separation from Nuclear Waste via Supramolecular Self-Assembly of Flexible Molecule: High Capacity, Selectivity, and Fast Recovery, *Adv. Funct. Mater.*, 2025, e22094.
- [9] H. Zhang, A. Li, K. Li, Z. Wang, X. Xu, Y. Wang, M. V. Sheridan, H.-S. Hu, C. Xu, E. V. Alekseev, Z. Zhang, P. Yan, K. Cao, Z. Chai, T. E. Albrecht-Schönzart and S. Wang, Ultrafiltration separation of Am(VI)-polyoxometalate from lanthanides, *Nature*, 2023, **616**, 482-487.
- [10] X. Yin, Y. Wang, X. Li, J. Xie, M. A. Silver, L. Chen, D. Sheng, G. Ji, Z. Chai and S. Wang, Competing Crystallization between Lanthanide and Actinide in Acidic Solution Leading to Their Efficient Separation, *Chin. J. Chem.*, 2019, **37**, 53-57.
- [11] Y. Li, G. Zhang, X. Zhou, Q. Zou, J. Chen, Y. Cui, P. Lin and J. Lin, Highly selective crystallization of uranium complexes for actinide partitioning in nuclear waste streams, *J. Environ. Chem. Eng.*, 2025, **13**, 120317.
- [12] J. Wang, Y. Li, R. Yao, B. Yang, W. Qu, J. Lu, Z. Wu, Y. Li, Z. Lu, Z. Geng and Z. Wang, Selective Crystallization Separation of Uranium(VI) Complexes from Lanthanides, *Inorg. Chem.*, 2024, **64**, 202–212.
- [13] Y. Li, H. Lu, Y. Du, J. Qiu, P. Lin and J. Lin, Highly Efficient Separation of High-Valent Actinide Ions from Lanthanides via Fractional Crystallization, *Chin. J. Struct. Chem.*, 2025, **44**, 100562.
